# Supplementary material
Source: Research Square preprint supplement (doi:10.21203/rs.3.rs-10356765/v1)
Supplement: Supplementary file 1 [file 902a14faee98f5d1b2aec5de.docx]

**Supplementary Information**

Development of an In Vitro Denture Stomatitis Model Simulating *Candida albicans* Biofilm Formation and Detachment under Daily Antiseptic Immersion

Pornpot Jiangkongkho 1, Thatawee Khemwong2*

¹Department of Restorative Dentistry, Faculty of Dentistry, Naresuan University, Phitsanulok, Thailand

2Department of Oral Diagnosis, Faculty of Dentistry, Naresuan University, Phitsanulok, Thailand

*Corresponding author: Assistant Professor Dr. Thatawee Khemwong, Thataweek@nu.ac.th


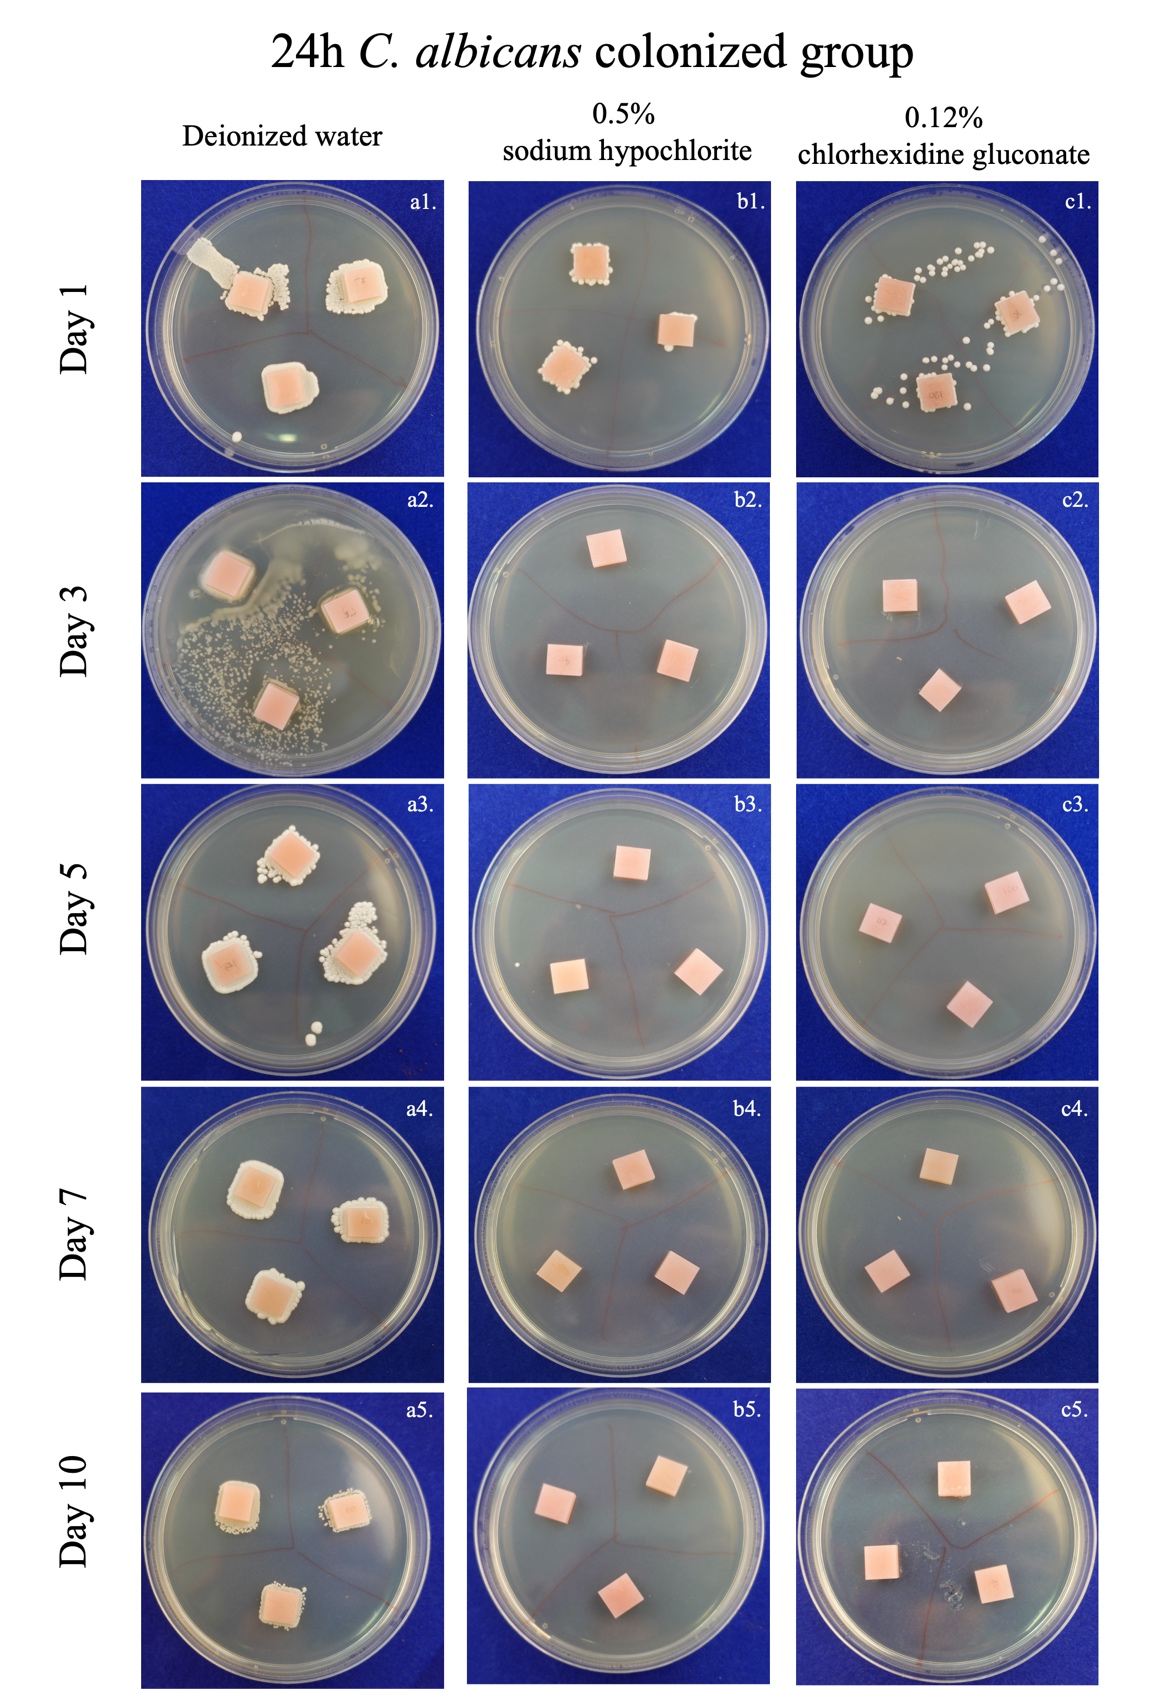


**Supplementary Figure S1.** Photographic images of the 24 h colonization group (a1–5, b1–5, c1–5), taken after 72 h of incubation. Residual *C. albicans* was observed across all deionized water timepoints (a1–5), albeit slightly reduced. In the 0.5% sodium hypochlorite group, *C. albicans* colonies were observed until Day 5 (b3–5). In the 0.12% chlorhexidine gluconate group, no colonies were observed after Day 5 (c3–5).


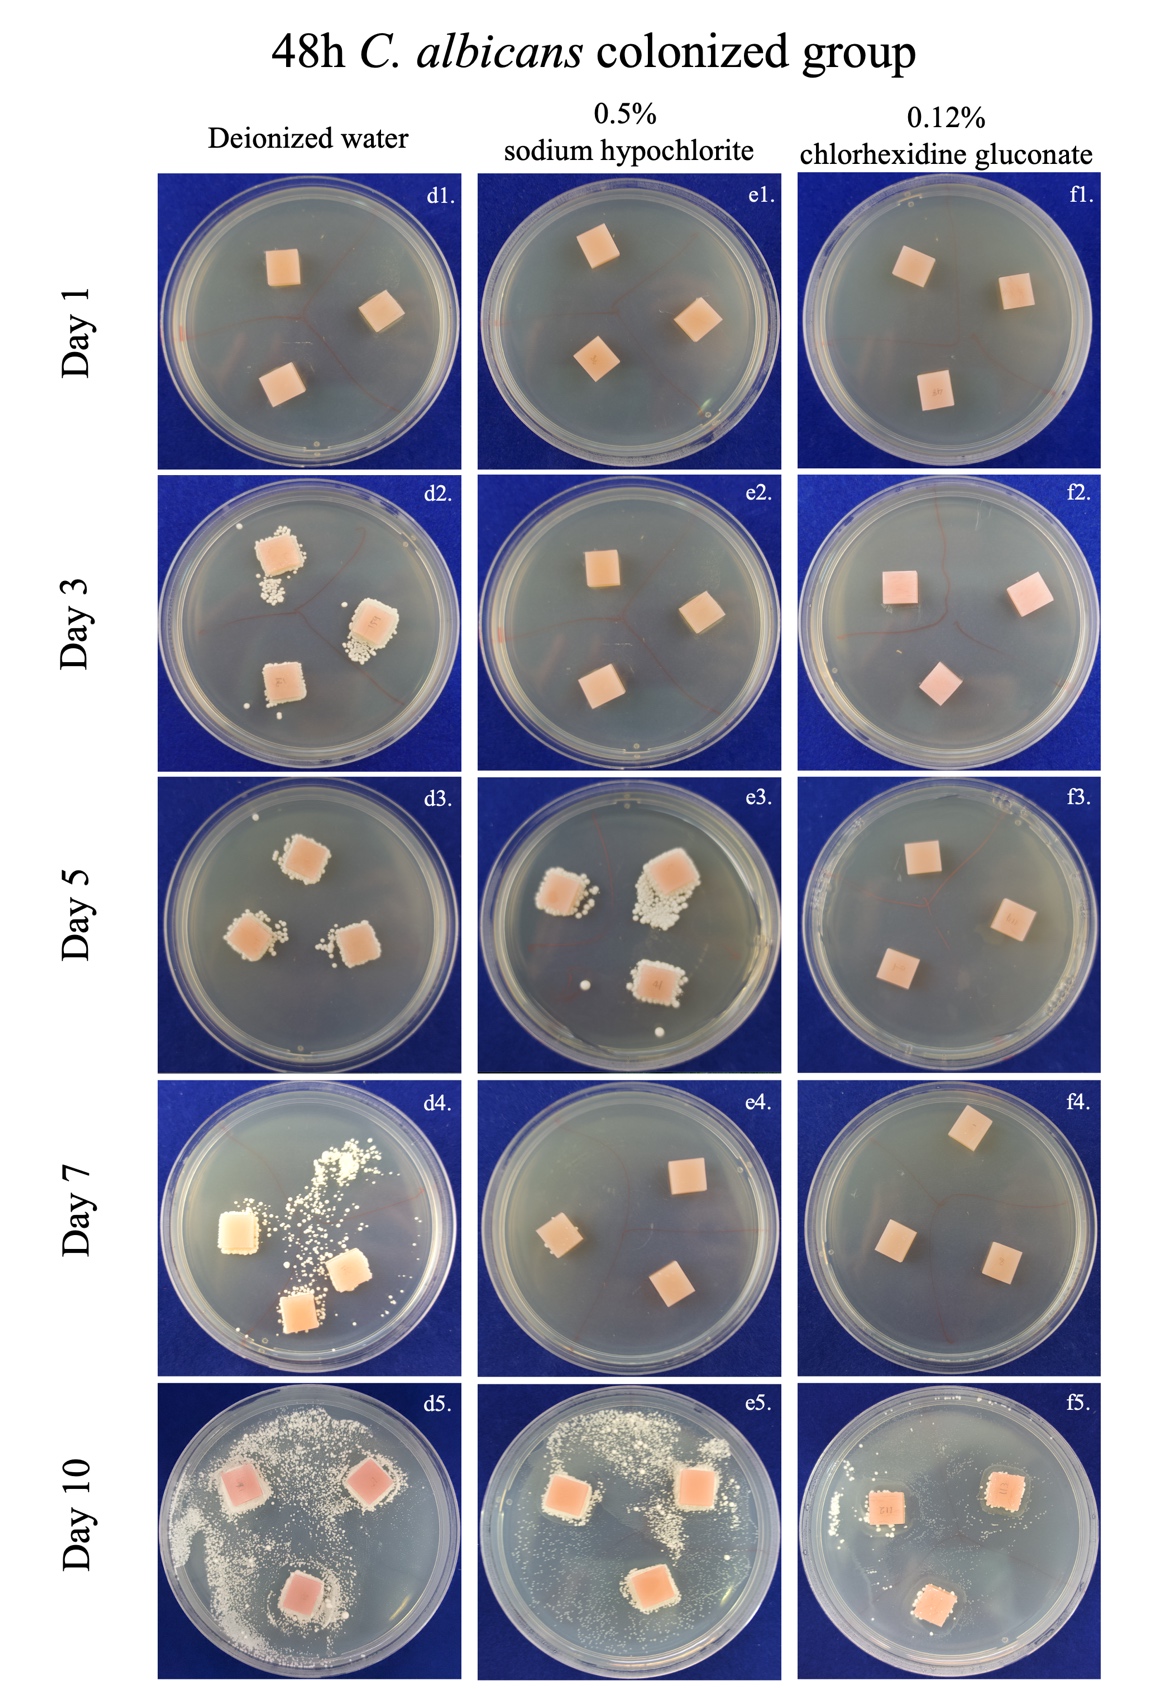


**Supplementary Figure S2.** Photographic images of the 48 h colonization group (d1–5, e1–5, f1–5), taken after 72 h of incubation. Residual *C. albicans* was observed in the deionized water group (d1–5) and the 0.5% sodium hypochlorite group (e1–4), though colony numbers gradually decreased. In the 0.12% chlorhexidine gluconate group, colonies disappeared by Day 5 (f3–4). On Day 10, positive results were observed in both treated groups (e5, f5) owing to contamination of the broth.


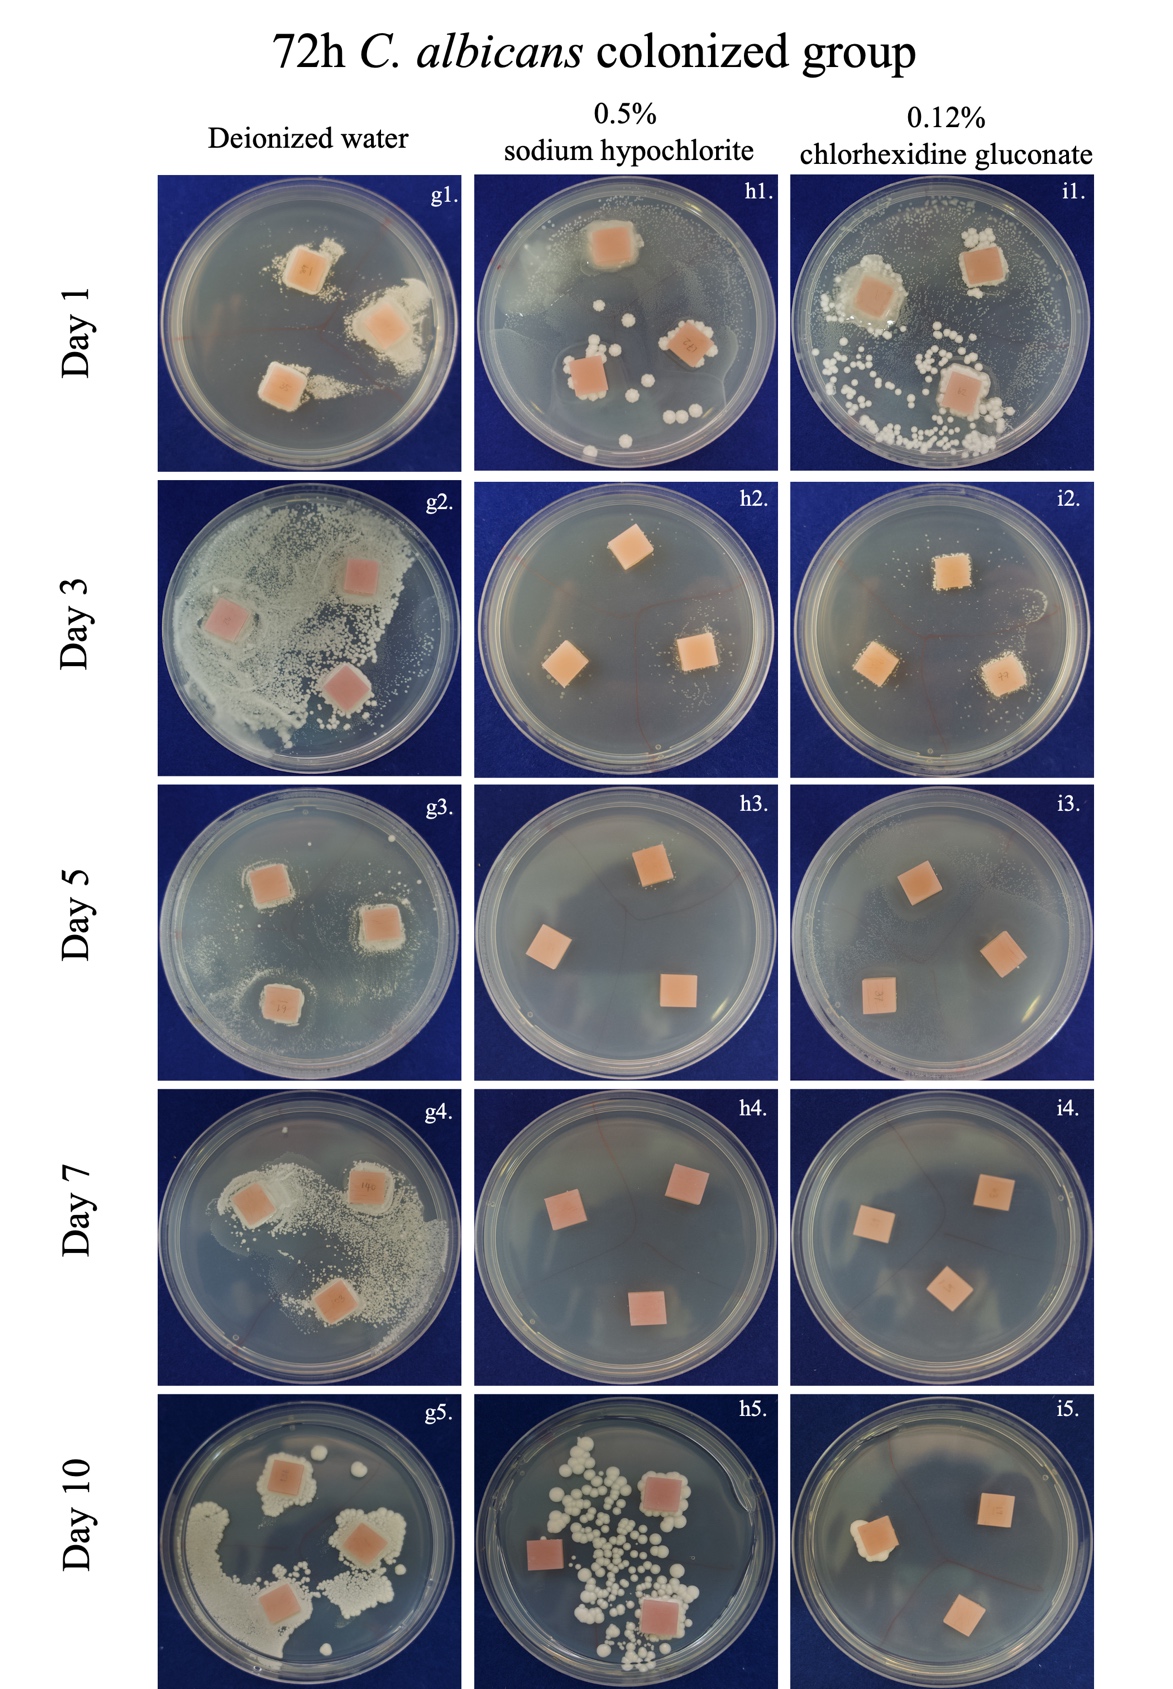


**Supplementary Figure S3.** Photographic images of the 72 h colonization group (g1–5, h1–5, i1–5), taken after 72 h of incubation. Residual *C. albicans* was observed in the deionized water group (g1–5), decreasing gradually. In the 0.12% chlorhexidine gluconate group, colonies gradually decreased (i1–3) and disappeared by Day 7 (i4). The 0.5% sodium hypochlorite group showed colonies throughout the timeline, with numbers gradually decreasing until Day 7 (h1–4); however, colonies reappeared at Day 10 in both treated groups (h5, i5).
